# Supplementary material for: The Joint Effects of Diet and Dietary Supplements in Relation to Obesity and Cardiovascular Disease over a 10-Year Follow-Up: A Longitudinal Study of 69,990 Participants in Australia
Source: MDPI journal article supplement (doi:10.3390/nu13030944), 2021-03-15
Supplement: s1 [file s1]

**Table S1. Scoring dietary consumption**

| Dietary consumption              | Men<br>Age groups                            |                                                              | Women<br>Age groups                                       |                                          |
|----------------------------------|----------------------------------------------|--------------------------------------------------------------|-----------------------------------------------------------|------------------------------------------|
|                                  | 51-70 years                                  | 70+ years                                                    | 51-70 years                                               | 70+ years                                |
| Vegetable <sup>†</sup>           | ≥5.5 serve per day=0<br><5.5 serve per day=1 | ≥5 serve per day=0<br><5 serve per day=1                     | ≥5 serve per day=0<br><5 serve per day=1                  | ≥5 serve per day=0<br><5 serve per day=1 |
| Fruit <sup>†</sup>               |                                              |                                                              | ≥2 serve per day=0<br><2 serve per day=1                  |                                          |
| Grains                           |                                              |                                                              | High frequency=0<br>Medium frequency=1<br>Low frequency=2 |                                          |
| Lean meats, poultry and seafood* |                                              |                                                              | High frequency=0<br>Medium frequency=1<br>Low frequency=2 |                                          |
| Dairy**                          |                                              |                                                              | Yes=0<br>No=1                                             |                                          |
| Food diversity                   |                                              | Consume all five groups=0, Not consume all five groups=1     |                                                           |                                          |
| Alcohol consumption              |                                              | ≤10 standard drink per week=0, >10 standard drink per week=1 |                                                           |                                          |

<sup>†</sup> A serve of vegetable was considered as half a cup of cooked vegetables or one cup of salad. A serve of fruit was considered as 1 medium piece or 2 small pieces or 1 cup of diced or canned fruit pieces.

\* include beef, lamb, pork, chicken, turkey, duck, fish, and seafood.

\*\* include cheese and milk

**Table S2. Group classifications of joint diet and dietary supplements consumption**

| <b>Group classifications</b>                  | <b>N</b> | <b>Explanations</b>                                                                                         |
|-----------------------------------------------|----------|-------------------------------------------------------------------------------------------------------------|
| <b>MVM</b>                                    |          |                                                                                                             |
| Healthy diet (+), no MVM (-)                  | 31,058   | Dietary behavior scores less than mean (0-4), had no MVM at baseline and follow-up                          |
| Healthy diet (+), new MVM (+)                 | 6,223    | Dietary behavior scores less than mean (0-4), had no MVM at baseline, but had MVM at follow-up              |
| Healthy diet (+), former MVM (+, -)           | 5,317    | Dietary behavior scores less than mean (0-4), had MVM at baseline, but no MVM at follow-up                  |
| Healthy diet (+), long-term MVM (+, +)        | 7,967    | Dietary behavior scores less than mean (0-4), had MVM at baseline and follow-up                             |
| Unhealthy diet (-), no MVM (-)                | 12,134   | Dietary behavior scores greater than mean (5-9), had no MVM at baseline and follow-up                       |
| Unhealthy diet (-), new MVM (+)               | 2,390    | Dietary behavior scores greater than mean (5-9), had no MVM at baseline, but had MVM at follow-up           |
| Unhealthy diet (-), former MVM (+, -)         | 2,000    | Dietary behavior scores greater than mean (5-9), had MVM at baseline, but no MVM at follow-up               |
| Unhealthy diet (-), long-term MVM (+, +)      | 2,897    | Dietary behavior scores greater than mean (5-9), had MVM at baseline and follow-up                          |
| <b>Fish oil</b>                               |          |                                                                                                             |
| Healthy diet (+), no fish oil (-)             | 21,179   | Dietary behavior scores less than mean (0-4), had no fish oil at baseline and follow-up                     |
| Healthy diet (+), new fish oil (+)            | 8,155    | Dietary behavior scores less than mean (0-4), had no fish oil at baseline, but had fish oil at follow-up    |
| Healthy diet (+), former fish oil (+, -)      | 6,534    | Dietary behavior scores less than mean (0-4), had fish oil at baseline, but no fish oil at follow-up        |
| Healthy diet (+), long-term fish oil (+, +)   | 14,696   | Dietary behavior scores less than mean (0-4), had fish oil at baseline and follow-up                        |
| Unhealthy diet (-), no fish oil (-)           | 10,104   | Dietary behavior scores greater than mean (5-9), had no fish oil at baseline and follow-up                  |
| Unhealthy diet (-), new fish oil (+)          | 3,105    | Dietary behavior scores greater than mean (5-9), had no fish oil at baseline, but had fish oil at follow-up |
| Unhealthy diet (-), former fish oil (+, -)    | 2,286    | Dietary behavior scores greater than mean (5-9), had fish oil at baseline, but no fish oil at follow-up     |
| Unhealthy diet (-), long-term fish oil (+, +) | 3,926    | Dietary behavior scores greater than mean (5-9), had fish oil at baseline and follow-up                     |
| <b>Calcium</b>                                |          |                                                                                                             |
| Healthy diet (+), no Calcium (-)              | 40,414   | Dietary behavior scores less than mean (0-4), had no Calcium at baseline and follow-up                      |
| Healthy diet (+), new Calcium (+)             | 3,755    | Dietary behavior scores less than mean (0-4), had no Calcium at baseline, but had Calcium at follow-up      |
| Healthy diet (+), former Calcium (+, -)       | 2,776    | Dietary behavior scores less than mean (0-4), had Calcium at baseline, but no Calcium at follow-up          |
| Healthy diet (+), long-term Calcium (+, +)    | 3,620    | Dietary behavior scores less than mean (0-4), had Calcium at baseline and follow-up                         |
| Unhealthy diet (-), no Calcium (-)            | 16,856   | Dietary behavior scores greater than mean (5-9), had no Calcium at baseline and follow-up                   |
| Unhealthy diet (-), new Calcium (+)           | 1,099    | Dietary behavior scores greater than mean (5-9), had no Calcium at baseline, but had Calcium at follow-up   |
| Unhealthy diet (-), former Calcium (+, -)     | 687      | Dietary behavior scores greater than mean (5-9), had Calcium at baseline, but no Calcium at follow-up       |
| Unhealthy diet (-), long-term Calcium (+, +)  | 779      | Dietary behavior scores greater than mean (5-9), had Calcium at baseline and follow-up                      |

**Figure S1. The joint effects of healthy vs. unhealthy diet and minerals and multivitamins consumption and the incidence of obesity and CVD (N=69,990)\***

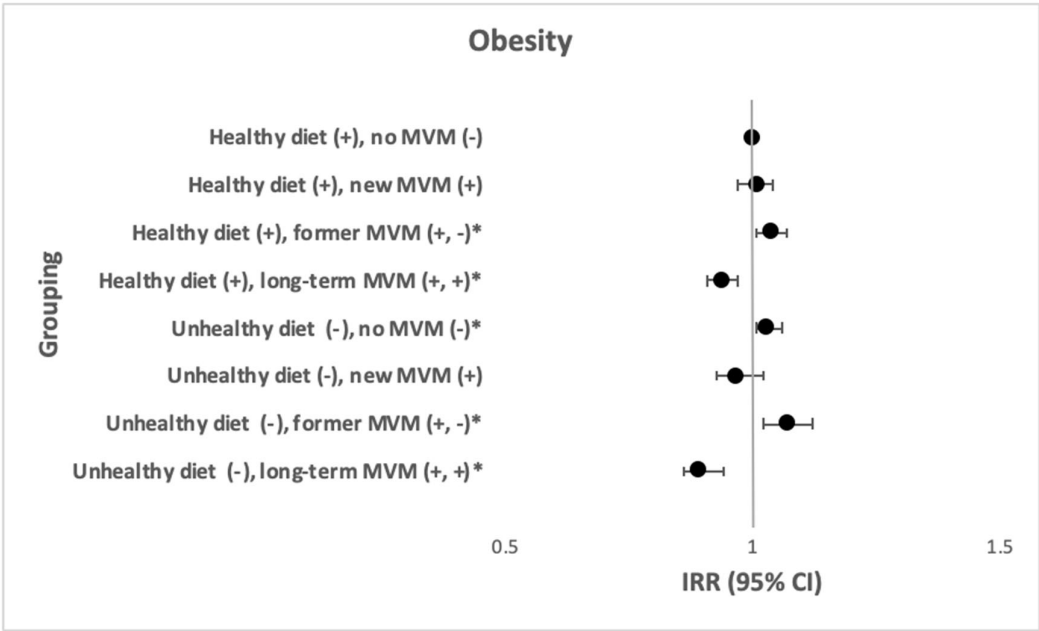

*\*IRR after adjustment of age, gender, country of birth, marital status, education, SEIFA, smoking, physical activity, CVD, diabetes, blood cholesterol and blood pressure.*

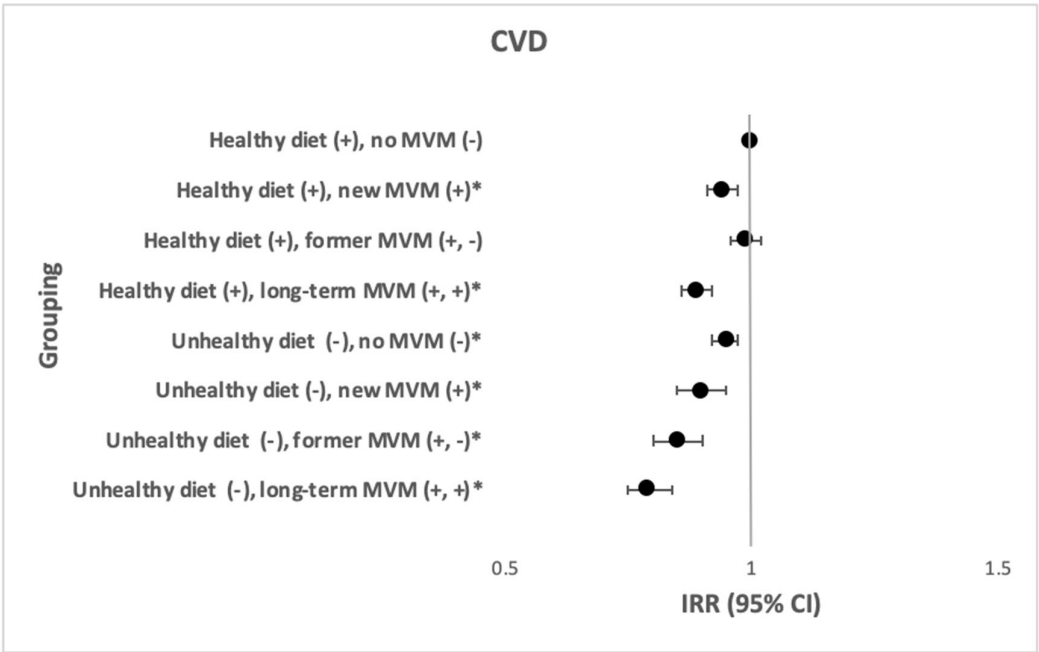

*\*IRR after adjustment of age, gender, country of birth, marital status, education, SEIFA, smoking, physical activity, obesity, diabetes, blood cholesterol and blood pressure.*

**Figure S2. The joint effects of healthy vs. unhealthy diet and fish oil consumption in relation to the incidence of obesity and CVD (N=69,990)\***

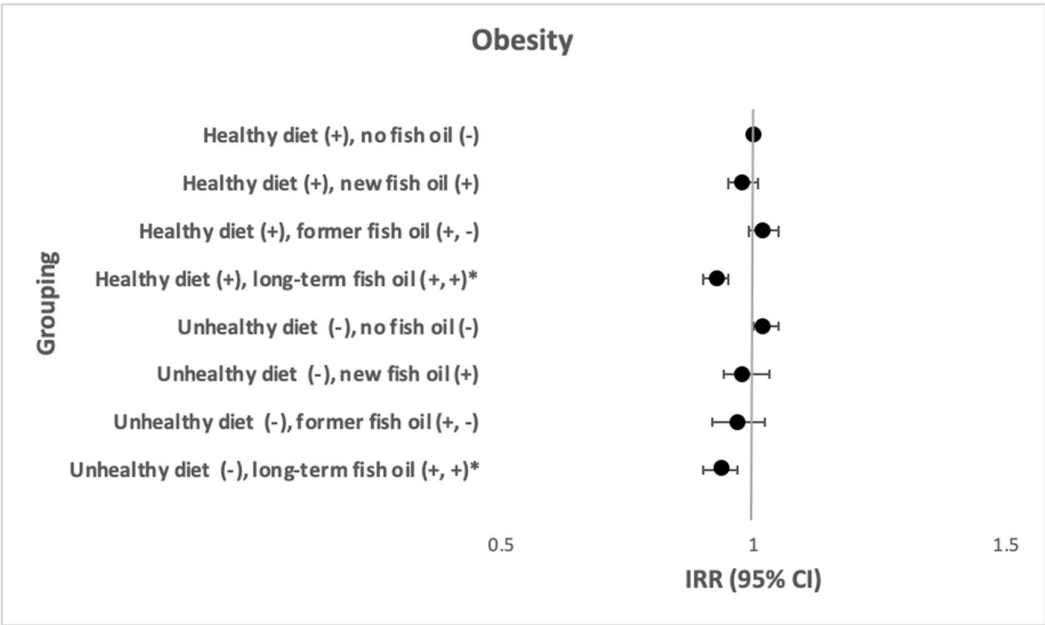

*\*IRR after adjustment of age, gender, country of birth, marital status, education, SEIFA, smoking, physical activity, CVD, diabetes, blood cholesterol and blood pressure.*

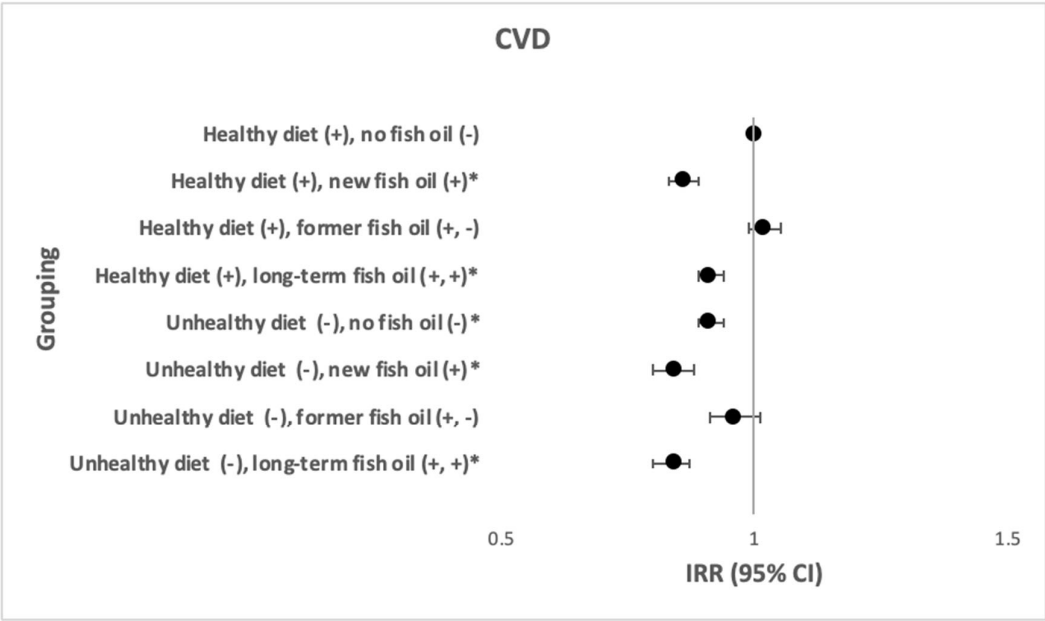

*\*IRR after adjustment of age, gender, country of birth, marital status, education, SEIFA, smoking, physical activity, obesity, diabetes, blood cholesterol and blood pressure.*

**Figure S3. The joint effects of healthy vs. unhealthy diet and calcium consumption in relation to the incidence of obesity and CVD (N=69,990)\***

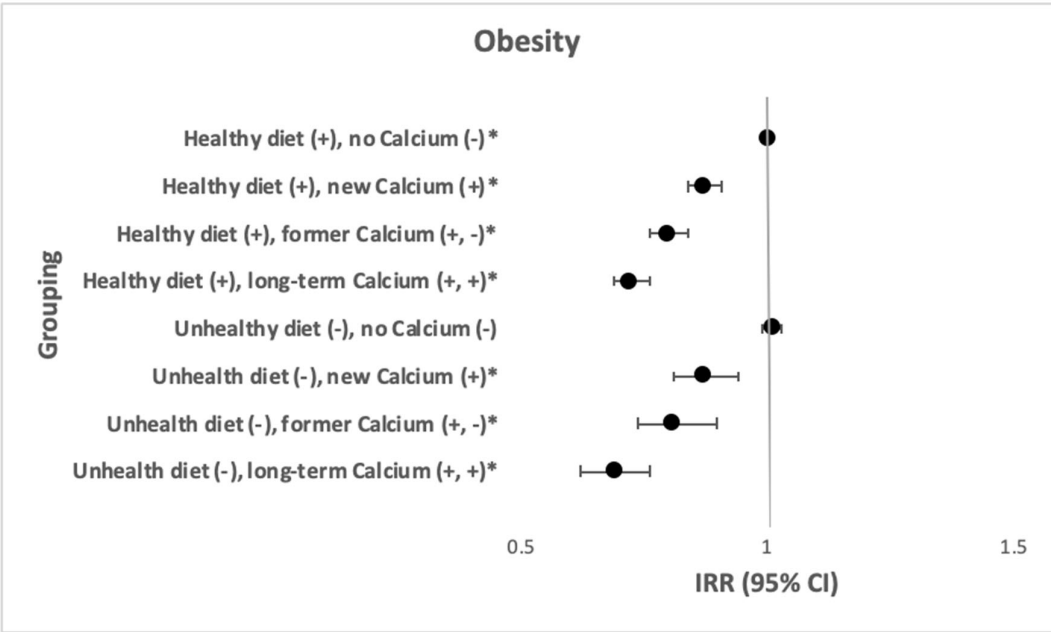

*\*IRR after adjustment of age, gender, country of birth, marital status, education, SEIFA, smoking, physical activity, CVD, diabetes, blood cholesterol, blood pressure and osteoarthritis.*

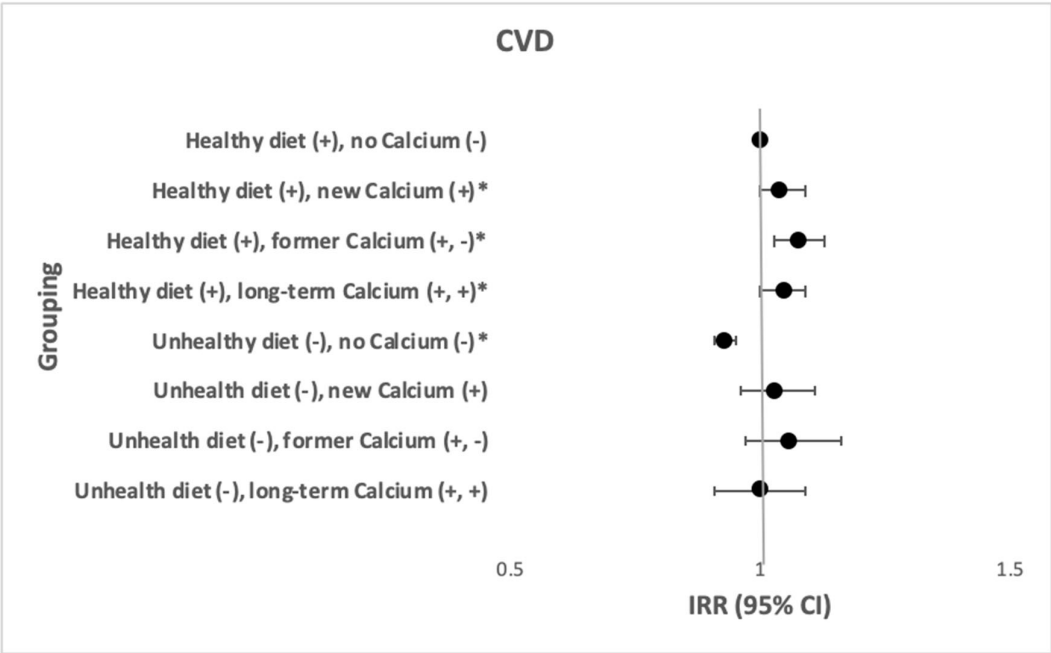

*\*IRR after adjustment of age, gender, country of birth, marital status, education, SEIFA, smoking, physical activity, obesity, diabetes, blood cholesterol, blood pressure and osteoarthritis.*

**Table S3. The joint effects of healthy vs. unhealthy diet and dietary supplements in relation to the incidence of both obesity and CVD (N=69,990)**

|                                               | Incidence of people with obesity and CVD* |                          |                          |                          |
|-----------------------------------------------|-------------------------------------------|--------------------------|--------------------------|--------------------------|
|                                               | Crude model                               | Model 2                  | Model 3                  | Model 4                  |
| <b>MVM</b>                                    |                                           |                          |                          |                          |
| Healthy diet (+), no MVM (-)                  | 1.00                                      | 1.00                     | 1.00                     | 1.00                     |
| Healthy diet (+), new MVM (+)                 | <b>0.87 (0.82; 0.93)</b>                  | <b>0.93 (0.87; 0.99)</b> | 0.94 (0.88; 1.00)        | 0.97 (0.91; 1.03)        |
| Healthy diet (+), former MVM (+, -)           | <b>0.89 (0.83; 0.95)</b>                  | 0.97 (0.90; 1.04)        | 0.96 (0.89; 1.03)        | 1.01 (0.94; 1.08)        |
| Healthy diet (+), long-term MVM (+, +)        | <b>0.70 (0.65; 0.74)</b>                  | <b>0.77 (0.72; 0.82)</b> | <b>0.78 (0.72; 0.83)</b> | <b>0.85 (0.80; 0.91)</b> |
| Unhealthy diet (-), No MVM (-)                | 1.04 (0.99; 1.09)                         | 1.05 (1.00; 1.10)        | 0.96 (0.91; 1.00)        | 0.97 (0.92; 1.02)        |
| Unhealthy diet (-), new MVM (+)               | <b>0.85 (0.77; 0.94)</b>                  | 0.92 (0.83; 1.01)        | <b>0.84 (0.75; 0.93)</b> | 0.91 (0.82; 1.00)        |
| Unhealthy diet (-), former MVM (+, -)         | <b>0.80 (0.71; 0.90)</b>                  | 0.89 (0.79; 1.00)        | <b>0.82 (0.72; 0.92)</b> | <b>0.88 (0.78; 0.99)</b> |
| Unhealthy diet (-), long-term MVM (+, +)      | <b>0.64 (0.58; 0.71)</b>                  | <b>0.70 (0.63; 0.78)</b> | <b>0.66 (0.59; 0.73)</b> | <b>0.72 (0.65; 0.80)</b> |
| <b>Fish oil</b>                               |                                           |                          |                          |                          |
| Healthy diet (+), no fish oil (-)             | 1.00                                      | 1.00                     | 1.00                     | 1.00                     |
| Healthy diet (+), new fish oil (+)            | <b>0.77 (0.72; 0.82)</b>                  | <b>0.80 (0.75; 0.85)</b> | <b>0.81 (0.76; 0.87)</b> | <b>0.87 (0.82; 0.93)</b> |
| Healthy diet (+), former fish oil (+, -)      | 1.00 (0.94; 1.07)                         | 1.02 (0.96; 1.08)        | 1.03 (0.97; 1.10)        | 1.04 (0.98; 1.11)        |
| Healthy diet (+), long-term fish oil (+, +)   | <b>0.73 (0.69; 0.77)</b>                  | <b>0.77 (0.73; 0.81)</b> | <b>0.80 (0.76; 0.85)</b> | <b>0.86 (0.81; 0.90)</b> |
| Unhealthy diet (-), no fish oil (-)           | 0.99 (0.94; 1.04)                         | 0.99 (0.94; 1.04)        | <b>0.90 (0.85; 0.95)</b> | <b>0.93 (0.88; 0.98)</b> |
| Unhealthy diet (-), new fish oil (+)          | <b>0.77 (0.71; 0.85)</b>                  | <b>0.82 (0.74; 0.90)</b> | <b>0.79 (0.72; 0.87)</b> | <b>0.86 (0.78; 0.94)</b> |
| Unhealthy diet (-), former fish oil (+, -)    | <b>0.90 (0.81; 0.99)</b>                  | 0.95 (0.86; 1.06)        | 0.90 (0.81; 1.00)        | 0.95 (0.86; 1.04)        |
| Unhealthy diet (-), long-term fish oil (+, +) | <b>0.72 (0.66; 0.78)</b>                  | <b>0.77 (0.70; 0.84)</b> | <b>0.74 (0.67; 0.80)</b> | <b>0.79 (0.72; 0.86)</b> |
| <b>Calcium</b>                                |                                           |                          |                          |                          |
| Healthy diet (+), no Calcium (-)              | 1.00                                      | 1.00                     | 1.00                     | 1.00                     |
| Healthy diet (+), new Calcium (+)             | <b>0.85 (0.78; 0.92)</b>                  | <b>0.88 (0.81; 0.96)</b> | <b>0.89 (0.82; 0.97)</b> | <b>0.86 (0.80; 0.94)</b> |
| Healthy diet (+), former Calcium (+, -)       | <b>0.81 (0.73; 0.89)</b>                  | <b>0.88 (0.80; 0.98)</b> | <b>0.88 (0.79; 0.97)</b> | <b>0.89 (0.80; 0.98)</b> |
| Healthy diet (+), long-term Calcium (+, +)    | <b>0.73 (0.67; 0.80)</b>                  | <b>0.78 (0.71; 0.85)</b> | <b>0.79 (0.72; 0.86)</b> | <b>0.77 (0.70; 0.84)</b> |
| Unhealthy diet (-), no Calcium (-)            | 0.99 (0.95; 1.03)                         | 1.00 (0.96; 1.04)        | <b>0.92 (0.88; 0.96)</b> | <b>0.94 (0.90; 0.98)</b> |
| Unhealthy diet (-), new Calcium (+)           | 0.92 (0.80; 1.05)                         | 1.05 (0.91; 1.20)        | 0.95 (0.83; 1.10)        | 0.99 (0.86; 1.13)        |
| Unhealthy diet (-), former Calcium (+, -)     | <b>0.66 (0.53; 0.82)</b>                  | <b>0.76 (0.61; 0.96)</b> | <b>0.70 (0.55; 0.87)</b> | <b>0.72 (0.58; 0.90)</b> |
| Unhealthy diet (-), long-term Calcium (+, +)  | <b>0.66 (0.54; 0.80)</b>                  | <b>0.76 (0.63; 0.93)</b> | <b>0.70 (0.57; 0.85)</b> | <b>0.70 (0.58; 0.85)</b> |

\* Model 1 is the crude model; model 2 after adjustment of age, gender, country of birth, marital status, education, SEIFA; model 3 after adjustment of smoking, physical activity; model 4 after diabetes, blood cholesterol and blood pressure. For calcium supplementation, model 4 further adjusted for osteoarthritis. † Bold:  $p < 0.05$ .

**Figure S4. The joint effects of healthy vs. unhealthy diet and minerals and multivitamins consumption and the incidence of obesity and CVD (N=100,109)\***

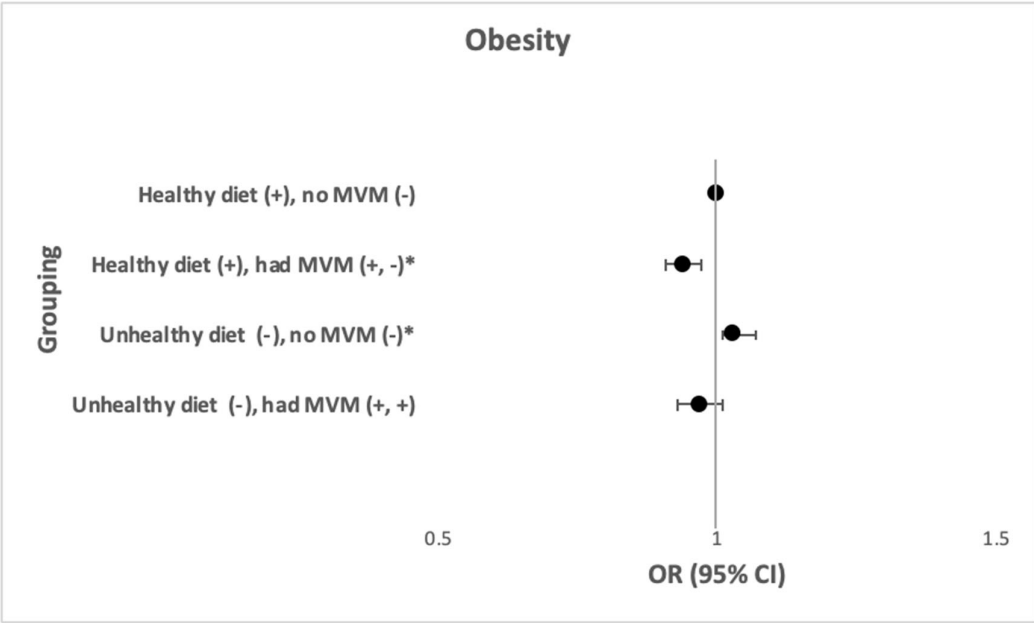

*\*OR after adjustment of age, gender, country of birth, marital status, education, SEIFA, smoking, physical activity, CVD, diabetes, blood cholesterol, blood pressure and survey wave.*

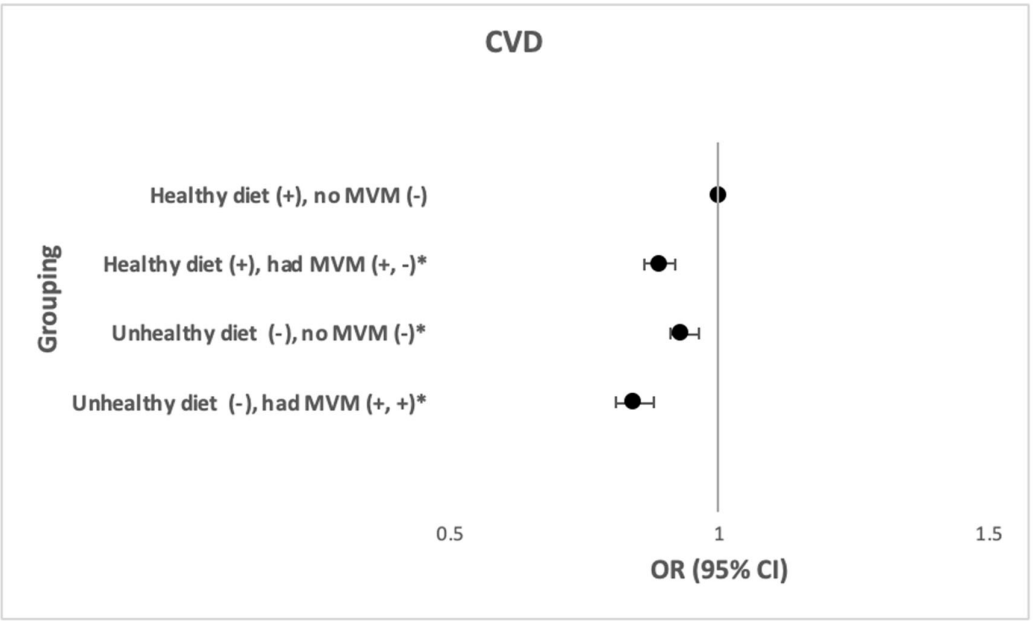

*\*OR after adjustment of age, gender, country of birth, marital status, education, SEIFA, smoking, physical activity, obesity, diabetes, blood cholesterol, blood pressure and survey wave.*

**Figure S5. The joint effects of healthy vs. unhealthy diet and fish oil consumption in relation to the incidence of obesity and CVD (N=100,109)\***

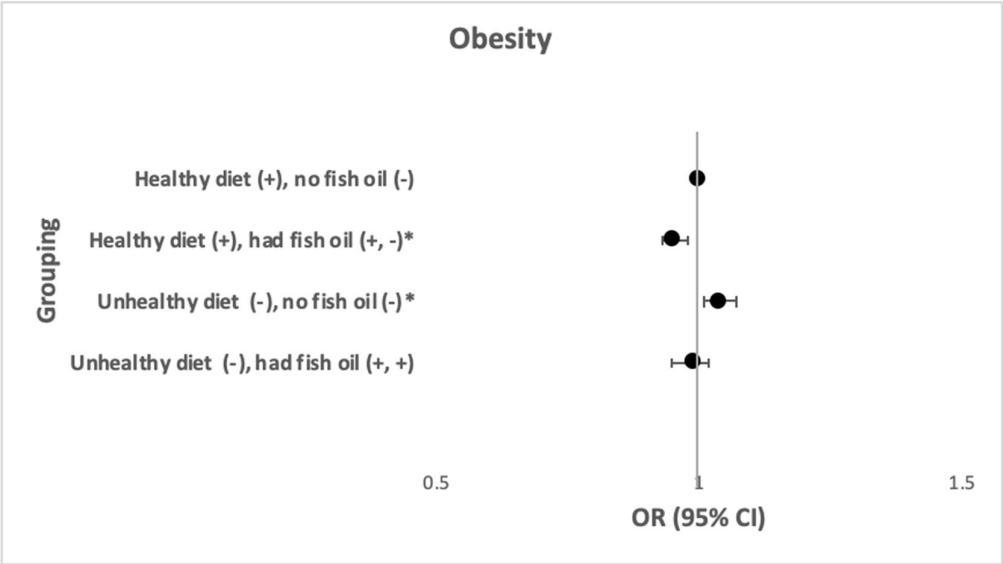

*\*OR after adjustment of age, gender, country of birth, marital status, education, SEIFA, smoking, physical activity, CVD, diabetes, blood cholesterol, blood pressure and survey wave.*

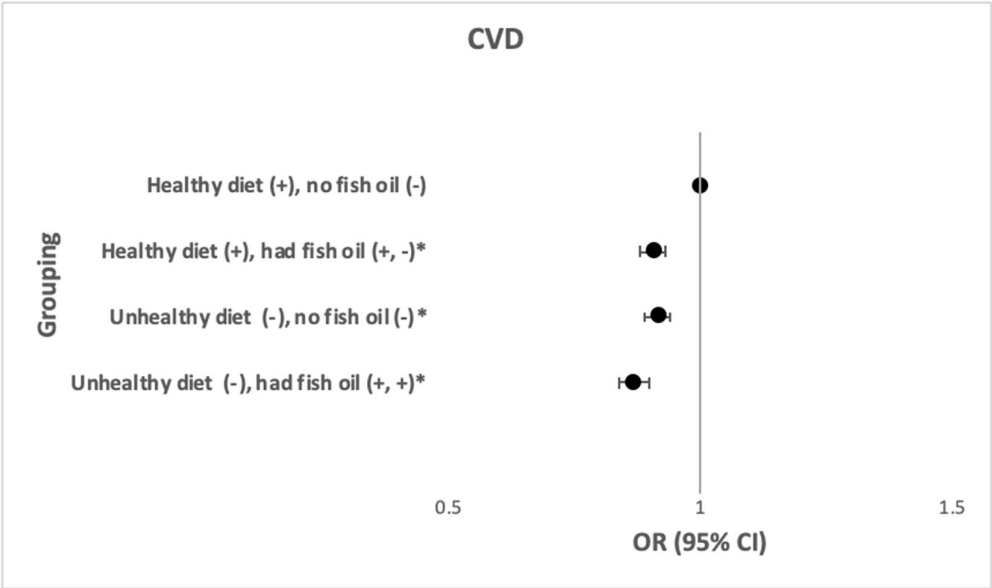

*\*OR after adjustment of age, gender, country of birth, marital status, education, SEIFA, smoking, physical activity, obesity, diabetes, blood cholesterol, blood pressure and survey wave.*



**Figure S6. The joint effects of healthy vs. unhealthy diet and calcium consumption in relation to the incidence of obesity and CVD (N=100,109)\***

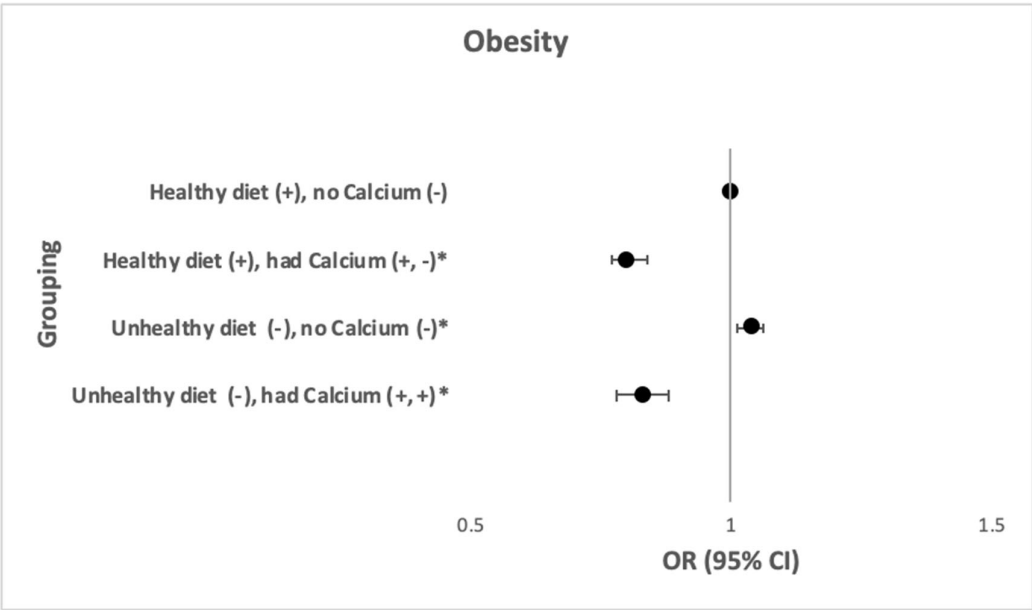

*\*OR after adjustment of age, gender, country of birth, marital status, education, SEIFA, smoking, physical activity, CVD, diabetes, blood cholesterol, blood pressure, osteoarthritis and survey wave.*

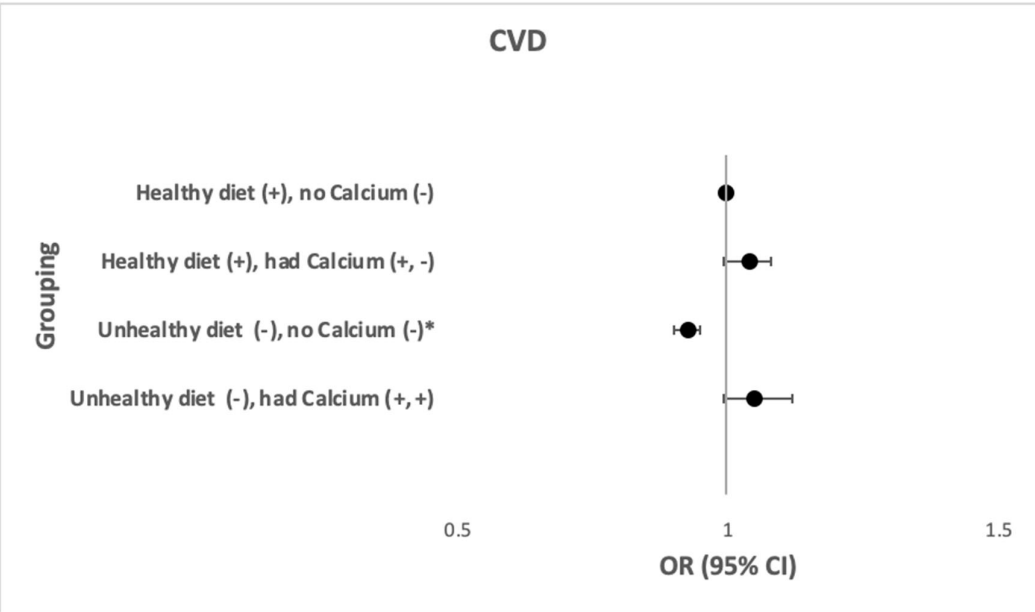

*\*OR after adjustment of age, gender, country of birth, marital status, education, SEIFA, smoking, physical activity, obesity, diabetes, blood cholesterol, blood pressure, osteoarthritis and survey wave.*

**Table S4. The joint effects of healthy vs. unhealthy diet and dietary supplements in relation to the incidence of both obesity and CVD (N=100,109)**

|                                     | Comorbid obesity in people with CVD* |                          |                          |                          |
|-------------------------------------|--------------------------------------|--------------------------|--------------------------|--------------------------|
|                                     | Odds Ratio (95% CI) †                |                          |                          |                          |
|                                     | Model 1                              | Model 2                  | Model 3                  | Model 4                  |
| <b>MVM</b>                          |                                      |                          |                          |                          |
| Healthy diet (+), no MVM (-)        | 1.00                                 | 1.00                     | 1.00                     | 1.00                     |
| Health diet (+), had MVM (+)        | <b>0.84 (0.80; 0.88)</b>             | <b>0.90 (0.85; 0.94)</b> | <b>0.90 (0.85; 0.95)</b> | <b>0.91 (0.86; 0.97)</b> |
| Unhealthy diet (-), no MVM (-)      | 1.04 (0.99; 1.08)                    | 1.04 (0.99; 1.09)        | 1.00 (0.95; 1.04)        | 1.01 (0.96; 1.06)        |
| Unhealth diet (-), had MVM (+)      | <b>0.86 (0.81; 0.92)</b>             | <b>0.91 (0.85; 0.97)</b> | <b>0.88 (0.82; 0.94)</b> | <b>0.88 (0.82; 0.95)</b> |
| <b>Fish oil</b>                     |                                      |                          |                          |                          |
| Healthy diet (+), no fish oil (-)   | 1.00                                 | 1.00                     | 1.00                     | 1.00                     |
| Health diet (+), had fish oil (+)   | <b>0.85 (0.81; 0.89)</b>             | <b>0.87 (0.83; 0.91)</b> | <b>0.88 (0.84; 0.93)</b> | <b>0.88 (0.83; 0.92)</b> |
| Unhealthy diet (-), no fish oil (-) | 1.00 (0.96; 1.04)                    | 1.00 (0.96; 1.04)        | 0.96 (0.92; 1.01)        | 0.98 (0.93; 1.03)        |
| Unhealth diet (-), had fish oil (+) | <b>0.92 (0.87; 0.98)</b>             | <b>0.94 (0.89; 1.00)</b> | <b>0.92 (0.87; 0.98)</b> | <b>0.90 (0.84; 0.96)</b> |
| <b>Calcium</b>                      |                                      |                          |                          |                          |
| Healthy diet (+), no Calcium (-)    | 1.00                                 | 1.00                     | 1.00                     | 1.00                     |
| Health diet (+), had Calcium (+)    | <b>0.89 (0.83; 0.95)</b>             | <b>0.91 (0.85; 0.98)</b> | <b>0.91 (0.84; 0.98)</b> | <b>0.84 (0.78; 0.91)</b> |
| Unhealthy diet (-), no Calcium (-)  | 1.03 (0.99; 1.07)                    | 1.03 (0.99; 1.07)        | 0.99 (0.95; 1.03)        | 0.99 (0.95; 1.04)        |
| Unhealth diet (-), had Calcium (+)  | 0.96 (0.87; 1.05)                    | 1.01 (0.92; 1.12)        | 0.97 (0.87; 1.08)        | <b>0.86 (0.77; 0.97)</b> |

\* Model 1 is the crude model; model 2 after adjustment of age, gender, country of birth, marital status, education, SEIFA; model 3 after adjustment of smoking, physical activity; model 4 after wave, diabetes, blood cholesterol and blood pressure. For calcium supplementation, model 4 further adjusted for osteoarthritis.

†Bold:  $p < 0.05$ .
